# Supplementary material
Source: PubMed Central journal article supplement (PMC7167473)
Supplement: JB.00725-19-s0001.pdf [file JB.00725-19-s0001.pdf]

## SUPPLEMENTARY DATA

Two routes for extracellular electron transfer in *Enterococcus faecalis*

Lars Hederstedt, Lo Gorton and Galina Pankratova

**Table S1** Oligonucleotides used in this work.

| <b>Primer</b> | <b>Sequence (5' to 3')</b> |
|---------------|----------------------------|
| invCATR2      | gctctgcaactcatcattctg      |
| invGFPR1      | cttcaccctctccactgaca       |
| ndh3dwn       | tgatacgtagccgcttct         |
| ndh3up        | gataatgcaattgccgc          |
| pplAmid       | gactgcacggtaacat           |
| pplAup        | acgccagcatacccagca         |

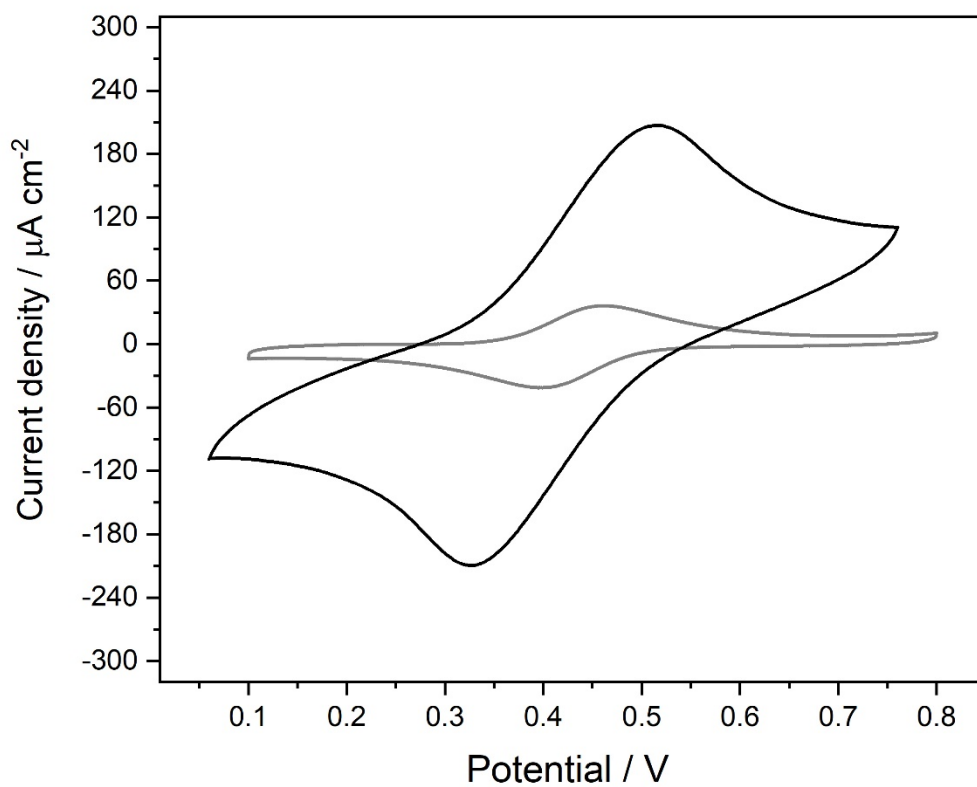

**Figure S1.** Representative cyclic voltammograms illustrating the electrochemical behavior of OsRP (black curve) and 0.5 mM  $\text{K}_3\text{Fe}(\text{CN})_6$  (grey curve), respectively, on graphite electrodes in 50 mM phosphate buffer pH 7.40. The scan rate was  $10 \text{ mV s}^{-1}$ .

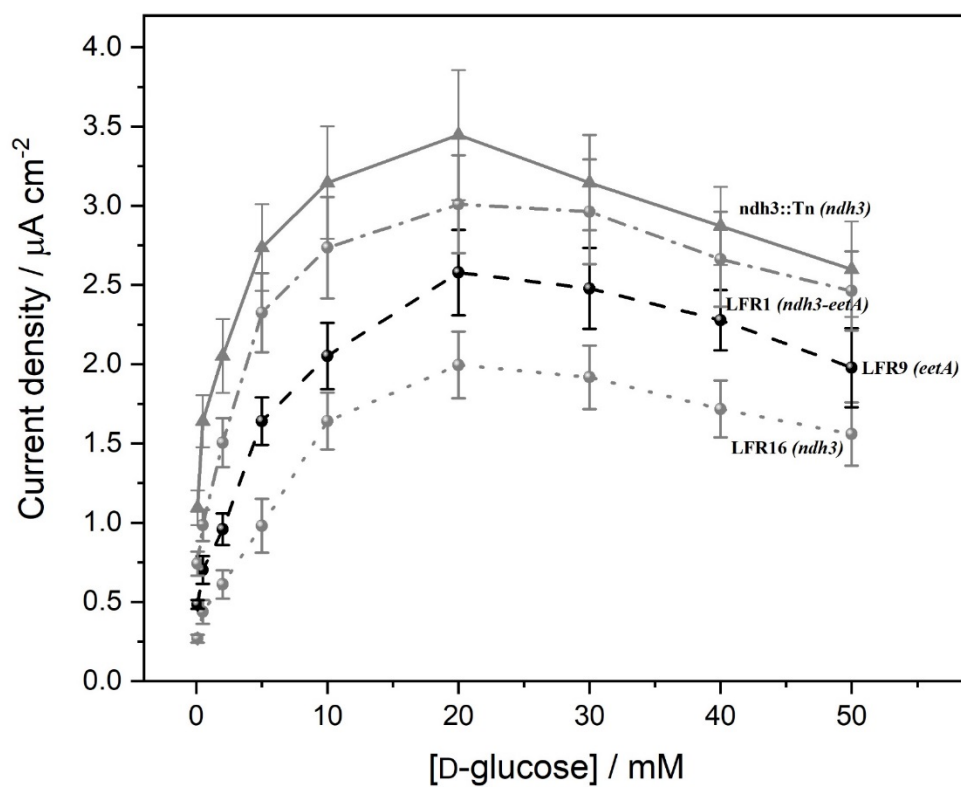

**Figure S2**

Amperometry with washed cells of *E. faecalis* ferric reductase defective strains grown without heme. The graph shows EET current density obtained depending on the D-glucose concentration provided to the cells and with ferricyanide as redox mediator.
